# Supplementary material for: Self-assembled free-standing three-dimensional nickel nanoparticle/graphene aerogel for direct ethanol fuel cells
Source: Royal Society of Chemistry journal article supplement (doi:10.1039/c3ta10657h), 2013-01-01
Supplement: c3ta10657h.pdf [file c3ta10657h.pdf]

## Supporting Information

### Self-Assembled Free-standing Three-Dimensional Nickel nanoparticle/Graphene Aerogel for Direct Ethanol Fuel Cell

*Long Ren,<sup>a</sup> K.S. Hui<sup>\*ab</sup> and K.N. Hui<sup>\*c</sup>*

<sup>a</sup>Department of Systems Engineering and Engineering Management, City University of Hong Kong, Hong Kong. E-mail: kwanshui@um.cityu.edu.hk;

Fax: +852 3442-0173; Tel: +852 3442-4759

<sup>b</sup>Department of Mechanical Engineering, Hanyang University, 17 Haengdang-dong, Seongdong-gu, Seoul 133-791, Republic of Korea. E-mail: kshui@hanyang.ac.kr;

Fax: +82 2-2220-2299; Tel: +82 2-2220-0441

<sup>c</sup>School of Materials Science and Engineering, Pusan National University, San 30 Jangjeon-dong, Geumjeong-gu, Busan 609-735, Republic of Korea.

E-mail: bizhui@pusan.ac.kr; Fax: +82 051-510-4457; Tel: +82 051-510-2467

## Additional Figures

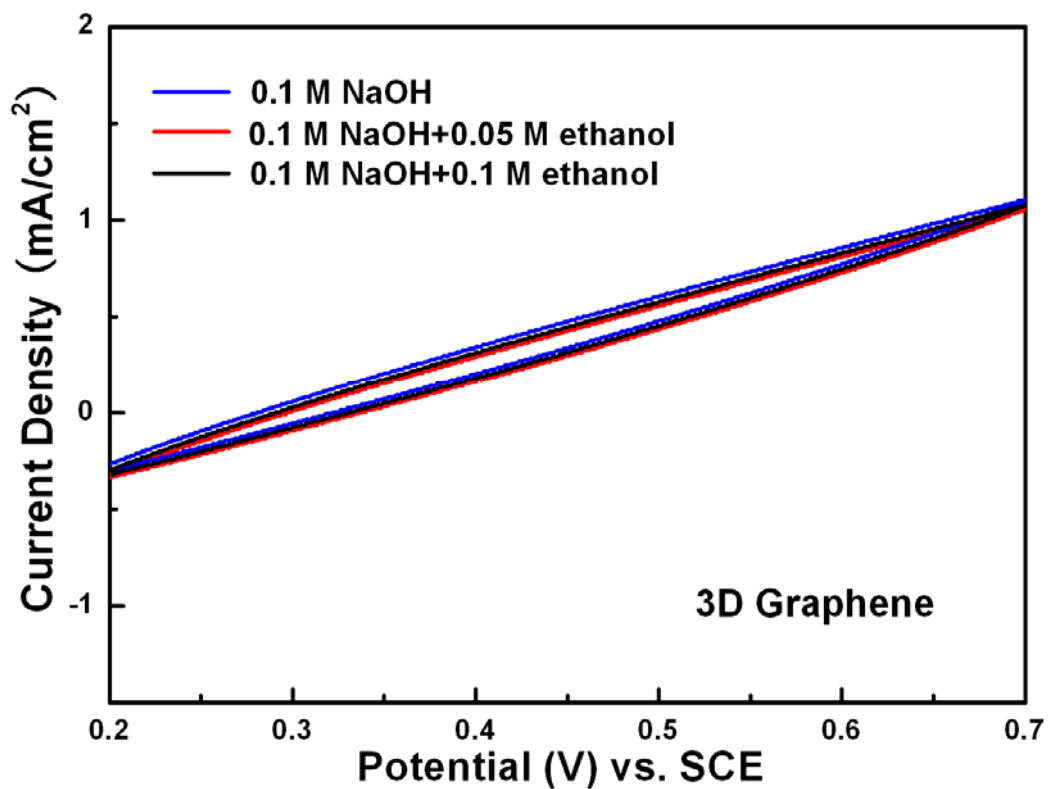

**Figure S1.** CVs of the pure graphene aerogel electrode in 0.1 M NaOH solution in the absence and presence of 0.05 M, 0.1 M ethanol. Scan rate: 0.1 V/s.
